# Supplementary material
Source: publisher figshare collection journal article supplement (https://tandf.figshare.com/articles/dataset/_/2073631)
Supplement: Supplementary file 1 [file 1]

*Supplementary material for* Greim H, et al. (2015). Evaluation of carcinogenic potential of the herbicide glyphosate, drawing on tumor incidence data from fourteen chronic/carcinogenicity rodent studies. *Critical Reviews in Toxicology*, 45: 185–208.
