# Supplementary material
Source: publisher figshare collection journal article supplement (https://tandf.figshare.com/articles/dataset/_/2073631)
Supplement: Supplementary file 2 [file 1]

Archive with 2 entries (2 files):
- 1003423_suppl.pdf
- DataSupplementCombinedFilesUpdate_12-19-2014.pdf
