# Supplementary material
Source: publisher figshare collection journal article supplement (https://tandf.figshare.com/articles/dataset/_/2073631)
Supplement: Supplementary file 2 [file 1 › DataSupplementCombinedFilesUpdate_12-19-2014.pdf]

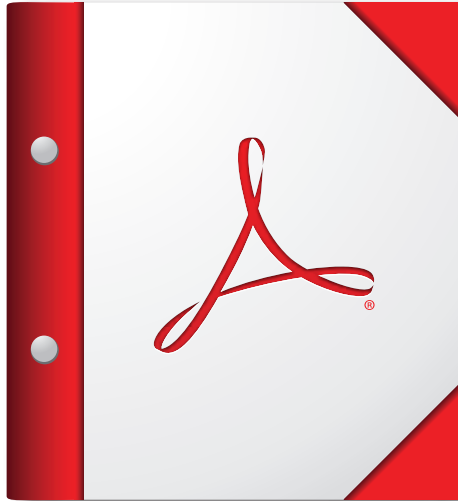

**For the best experience, open this PDF portfolio in  
Acrobat 9 or Adobe Reader 9, or later.**

**Get Adobe Reader Now!**
